# Supplementary material
Source: PubMed Central journal article supplement (PMC6309787)
Supplement: NIHMS1512039-supplement-1.pdf [file NIHMS1512039-supplement-1.pdf]

## Supplementary Material

### Supplementary Figure S1. CONSORT diagram

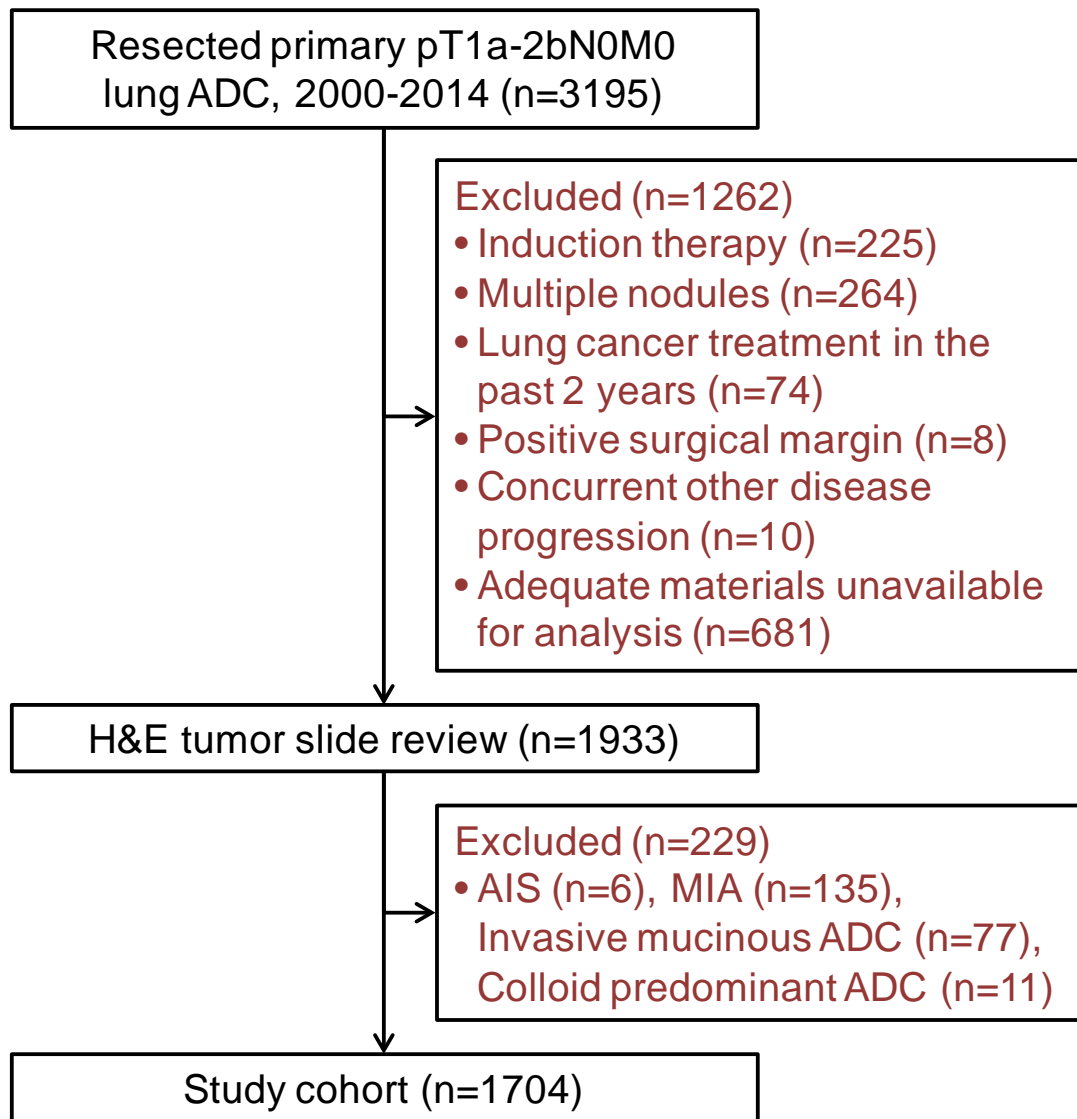

ADC, adenocarcinoma; AIS, adenocarcinoma in situ; H&E, hematoxylin and eosin; MIA, minimally invasive adenocarcinoma.
