# Supplementary material
Source: PubMed Central journal article supplement (PMC6309787)
Supplement: NIHMS1512039-supplement-2.pdf [file NIHMS1512039-supplement-2.pdf]

**Supplementary Figure S2.** Cumulative incidence of recurrence and lung cancer–specific death by pathologic stage based on invasive size (p-Stage[i]) and pathologic stage based on total size (p-Stage[t]).

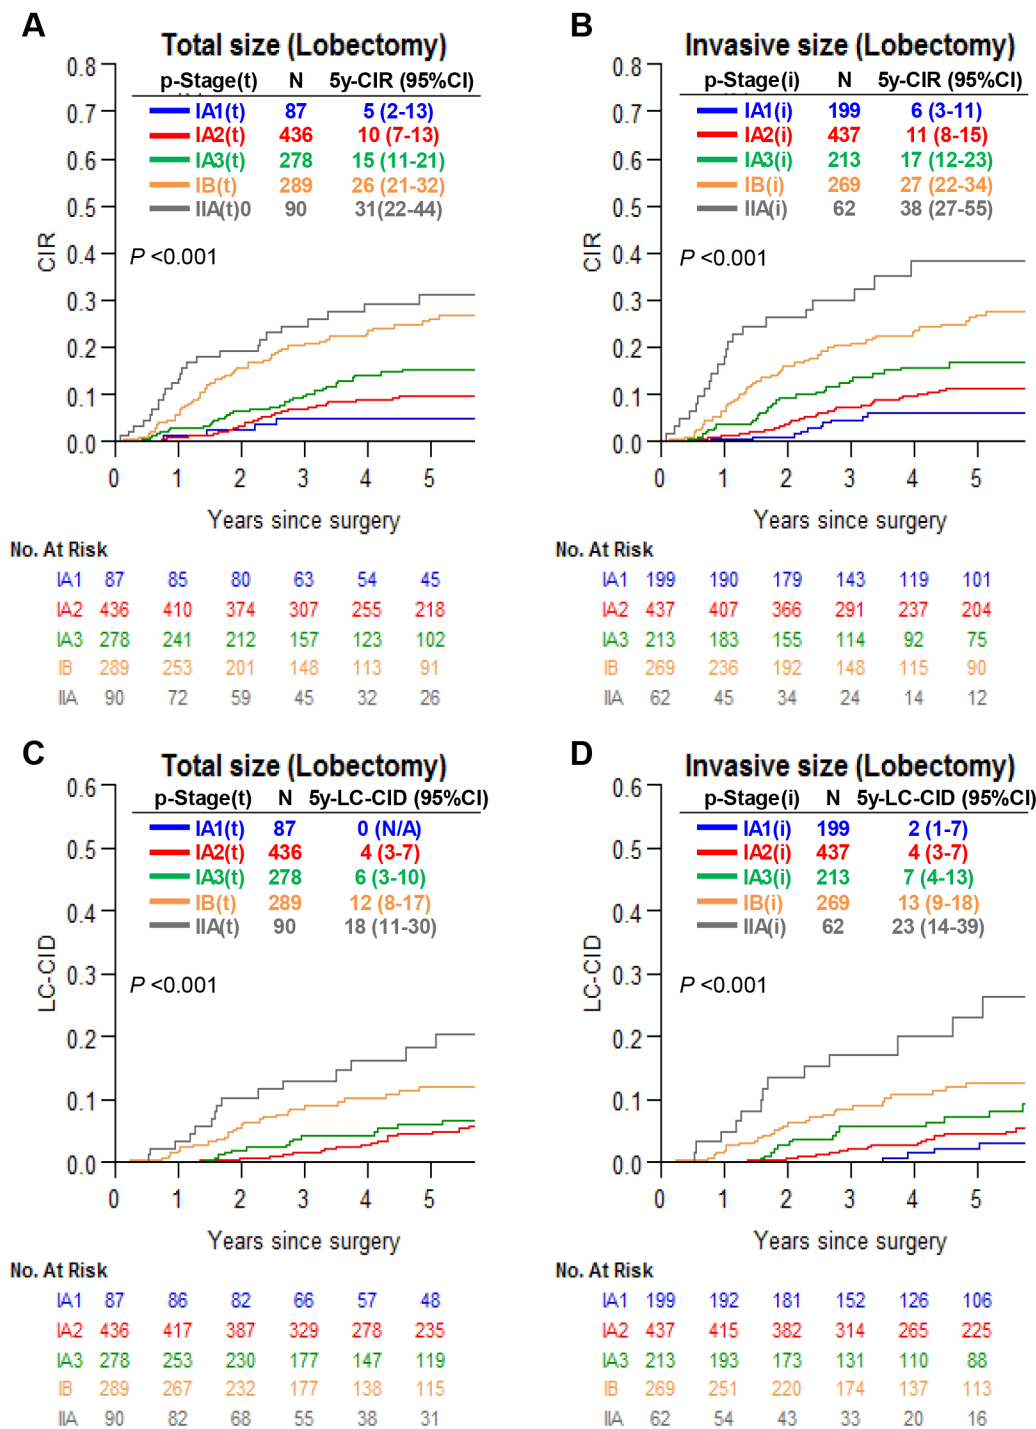

CI, confidence interval; CIR, cumulative incidence of recurrence; LC-CID, lung cancer–specific cumulative incidence of death; p-Stage, pathologic stage; p-Stage(i), p-Stage based on invasive size; p-Stage(t), p-Stage based on total size.
